# Supplementary material for: Hydrothermal synthesis of ZnO@polysiloxane microspheres and their application in preparing optical diffusers
Source: Royal Society of Chemistry journal article supplement (doi:10.1039/c4ra12217h), 2015-01-01
Supplement: c4ra12217h1.pdf [file c4ra12217h1.pdf]

# Supporting Information

## **Hydrothermal synthesis of ZnO@polysiloxane microspheres and their application in preparing optical diffusers**

Jingang Hu, Yuming Zhou<sup>\*</sup>, Xiaoli Sheng

School of Chemistry and Chemical Engineering, Southeast University, Optoelectronic  
Functional Materials and Engineering Laboratory, Jiangsu, Nanjing 211189, PR China

<sup>\*</sup>Corresponding author: Tel +86-25-52090617; Fax +86-25-52090617;

E-mail address: ymzhou@seu.edu.cn (Y. Zhou).

## **1、 Preparation of polysiloxane microspheres**

The preparation of polysiloxane microspheres using convenient sol-gel method were as follows: 8 mL VTMS in 50 mL ethanol was stirred at room temperature for 1h. Then, adjust pH value of the above solution to 6, and the reaction was continued for 4 hours. Subsequently, adjust pH value to 9 and the reaction was continued for 6 hours. Finally, the mixture was filtered and washed thoroughly with distilled water. It was dried in vacuum at 60 °C for 12 h to obtain polysiloxane microspheres.

## **2、 Characterization of polysiloxane microspheres**

### **FT-IR Analysis**

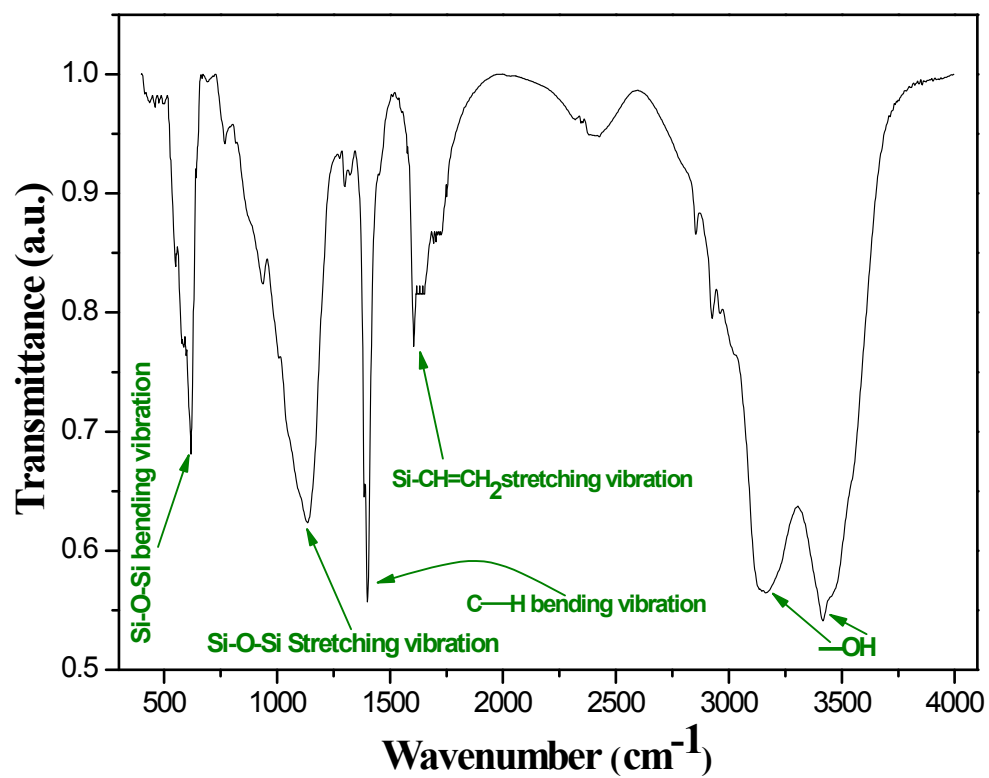

Figure S1. FT-IR spectra of poly(VTMS).

### XRD Analysis

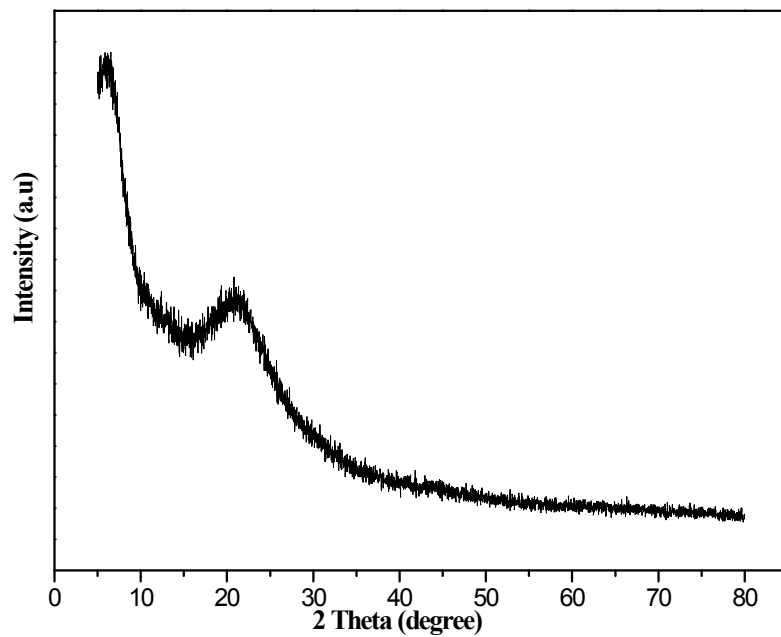

Figure S2. X-ray diffraction (XRD) patterns of poly(VTMS).

### Highlights

- ZnO@polysiloxane core-shell microspheres were successfully synthesized by hydrothermal assembly process.
- The target product possessed ZnO shell layer with nanometer size and core layer with polysiloxane microspheres.
- A “red shift” of the central peak position occurs in photoluminescence spectrum of ZnO@polysiloxane.
- A facile, efficient, simple and green approach to obtaining ZnO@polysiloxane hybrid microspheres.
